# Supplementary material for: A fully enzymatic method for site-directed spin labeling of long RNA
Source: PubMed Central journal article supplement — Nucleic Acids Res. 2014 Jun 30;42(15):e117. doi: 10.1093/nar/gku553 (PMC4150755; doi:10.1093/nar/gku553), 2014-06-30
Supplement: supp_gku553_nar-00972-met-g-2014-File008.pdf [file supp_gku553_nar-00972-met-g-2014-File008.pdf]

**Supplementary Figure 1: Reaction between 6-thioguanosine-5'-O-monophosphate (6-T-GMP) and 3-(2-Iodoacetamido)-proxyl (proxyl)**

One-dimensional  $^1\text{H}$  spectra of 6TGMP (top) and proxyl coupled to 6TGMP (bottom), recorded at 20°C.

**Supplementary Figure 2: Integrity of the RNA upon labeling reaction**

Denaturing 20 % polyacrylamide gel. Spin-labeled RNA and RNAs controls were loaded in the NMR buffer: lane 1, Spin-Labeled RNA (SL-RNA); lane 2, 55-nt RNA; lane 3, 22-nt RNA; lane 4: 14-nt RNA. The bromophenol blue band is indicated with “BB”. No degradation was observed upon labeling.

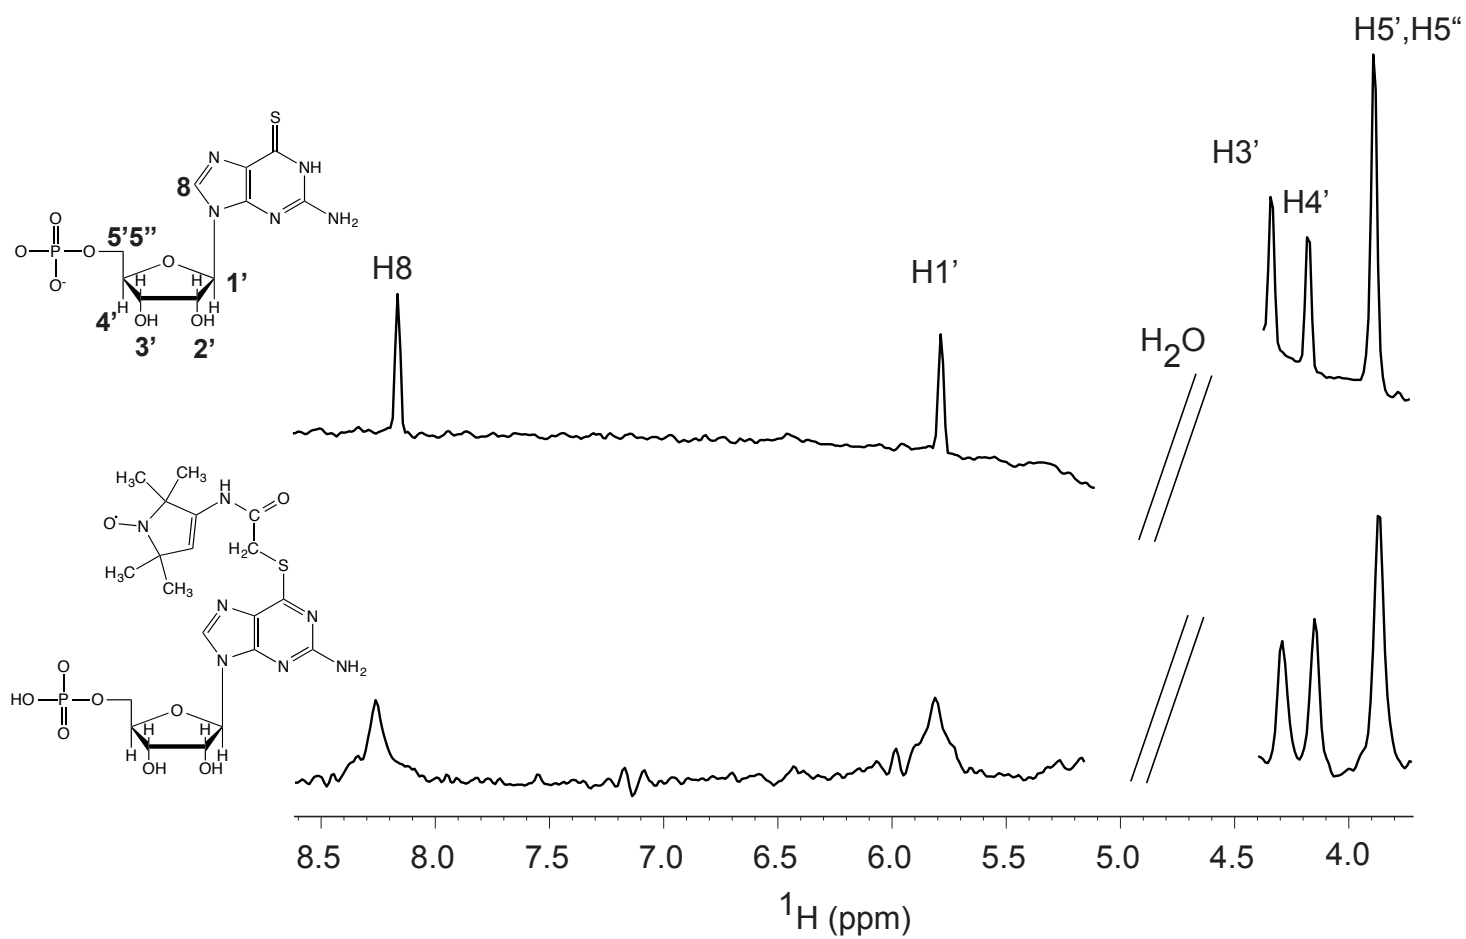

**Supplementary Figure 1**

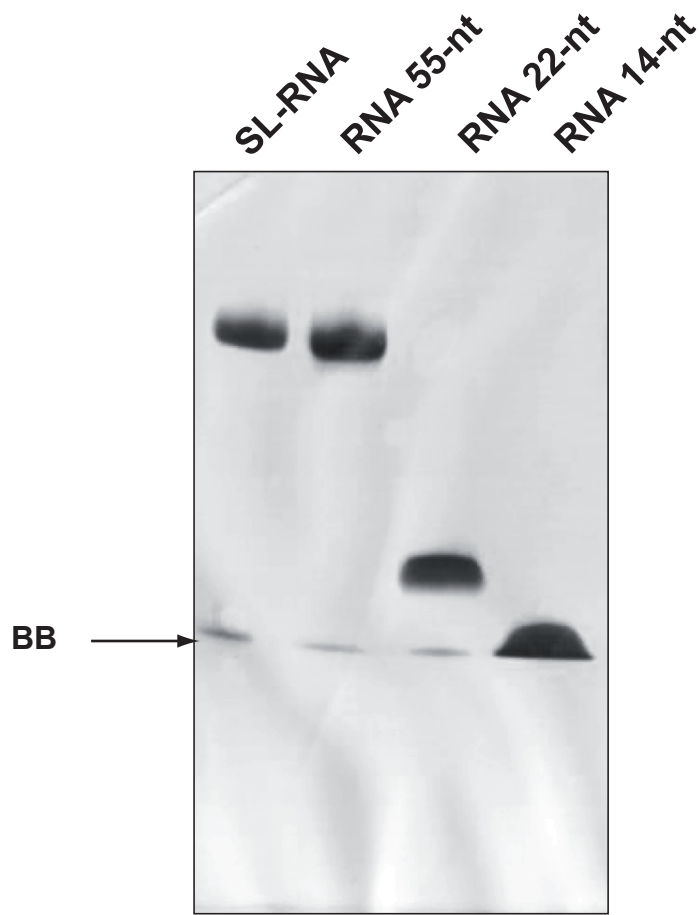

**Supplementary Figure 2**

**Supporting Table 1: Fragment Ions of RNase A-generated oligonucleotide 5'-A<sub>23</sub>G<sub>24</sub>SLG<sub>25</sub>A<sub>26</sub>C<sub>27</sub>p-3'**

| Ions series             | <i>y calc.</i> | y found | <i>x calc.</i> | x found | <i>w calc.</i> | w found |
|-------------------------|----------------|---------|----------------|---------|----------------|---------|
| C27                     | 322.2          | 321.7   | 384.1          | 383.7   | 402.2          | 401.7   |
| A26                     | 651.4          | 650.9   | 713.4          | 712.9   | 731.4          | 730.9   |
| G25                     | 996.6          | 996.1   | 1058.6         | 1058.1  | 1076.6         | 1076.2  |
| G24 <sub>6Tproxyl</sub> | 1554.9         | 1554.5  | 1616.9         | 1616.8  | 1634.9         | 1634.6  |
| A23                     | 1884.1         | 1883.7  |                |         |                |         |
